# Supplementary material
Source: publisher site journal article supplement (https://www.dovepress.com/article/199227)
Supplement: Supplementary file 1 [file get_supplementary_file.php]

**Supplementary Table 1:** Norwegian results from the MSE analysis using 5-years survival probability estimates. M = metal, C = ceramic, XLP = highly crosslinked polyethylene, Poly = conventional polyethylene. The first letter gives the femoral head material while the second gives the acetabulum bearing material.

| Patient category                                                   | Number of Norwegian patients | Number of NARA patients (excluding the Norwegian patients) | Number of Norwegian patients when the Norwegian MSE becomes lower than the NARA MSE |
|--------------------------------------------------------------------|------------------------------|------------------------------------------------------------|-------------------------------------------------------------------------------------|
| 20-59 years, male, cemented, head size less than 32 mm, M+Poly     | 460                          | 2586                                                       | 440                                                                                 |
| 20-59 years, female, cemented, head size less than 32 mm, M+Poly   | 804                          | 2863                                                       | 560                                                                                 |
| 60-74 years, male, cemented, head size less than 32 mm, M+Poly     | 2937                         | 16190                                                      | 460                                                                                 |
| 60-74 years, female, cemented, head size less than 32 mm, M+Poly   | 6235                         | 22348                                                      | 360                                                                                 |
| over 75 years, male, cemented, head size less than 32 mm, M+Poly   | 2391                         | 11131                                                      | 120                                                                                 |
| over 75 years, female, cemented, head size less than 32 mm, M+Poly | 6274                         | 20807                                                      | 960                                                                                 |

**Supplementary Table 2:** Norwegian results from the MSE analysis using 10-years survival probability estimates. M = metal, C = ceramic, XLP = highly crosslinked polyethylene, Poly = conventional polyethylene. The first letter gives the femoral head material while the second gives the acetabulum bearing material.

| Patient category                                                   | Number of Norwegian patients | Number of NARA patients (excluding the Norwegian patients) | Number of Norwegian patients when the Norwegian MSE becomes lower than the NARA MSE |
|--------------------------------------------------------------------|------------------------------|------------------------------------------------------------|-------------------------------------------------------------------------------------|
| 20-59 years, female, cemented, head size less than 32 mm, M+Poly   | 804                          | 2863                                                       | 140                                                                                 |
| 60-74 years, male, cemented, head size less than 32 mm, M+Poly     | 2937                         | 16190                                                      | 2060                                                                                |
| 60-74 years, female, cemented, head size less than 32 mm, M+Poly   | 6235                         | 22348                                                      | 1460                                                                                |
| over 75 years, male, cemented, head size less than 32 mm, M+Poly   | 2391                         | 11131                                                      | 160                                                                                 |
| over 75 years, female, cemented, head size less than 32 mm, M+Poly | 6274                         | 20807                                                      | 1340                                                                                |

**Supplementary Table 3:** Danish results from the MSE analysis using 5-years survival probability estimates. M = metal, C = ceramic, XLP = highly crosslinked polyethylene, Poly = conventional polyethylene. The first letter gives the femoral head material while the second gives the acetabulum bearing material. At 10 years there was no patient category with sufficient number of observations.

| Patient category                                                   | Number of Danish patients | Number of NARA patients (excluding the Danish patients) | Number of Danish patients when the Danish MSE becomes lower than the NARA MSE |
|--------------------------------------------------------------------|---------------------------|---------------------------------------------------------|-------------------------------------------------------------------------------|
| 60-74 years, male, cemented, head size less than 32 mm, M+Poly     | 428                       | 18699                                                   | 160                                                                           |
| 60-74 years, female, cemented, head size less than 32 mm, M+Poly   | 746                       | 27837                                                   | 80                                                                            |
| 60-74 years, female, hybrid, head size less than 32 mm, M+Poly     | 520                       | 335                                                     | 440                                                                           |
| over 75 years, male, cemented, head size less than 32 mm, M+Poly   | 475                       | 13047                                                   | 200                                                                           |
| over 75 years, female, cemented, head size less than 32 mm, M+Poly | 926                       | 26155                                                   | 100                                                                           |

**Supplementary Table 4:** Finish results from the MSE analysis using 5-years survival probability estimates. M = metal, C = ceramic, XLP = highly crosslinked polyethylene, Poly = conventional polyethylene. The first letter gives the femoral head material while the second gives the acetabulum bearing material.

| Patient category                                                   | Number of Finnish patients | Number of NARA patients (excluding the Finnish patients) | Number of Finnish patients when the Finnish MSE becomes lower than the NARA MSE |
|--------------------------------------------------------------------|----------------------------|----------------------------------------------------------|---------------------------------------------------------------------------------|
| 60-74 years, male, cemented, head size less than 32 mm, M+Poly     | 2175                       | 16952                                                    | 120                                                                             |
| 60-74 years, female, cemented, head size less than 32 mm, M+Poly   | 3209                       | 25374                                                    | 100                                                                             |
| over 75 years, male, cemented, head size less than 32 mm, M+Poly   | 1447                       | 12075                                                    | 140                                                                             |
| over 75 years, female, cemented, head size less than 32 mm, M+Poly | 3490                       | 23591                                                    | 260                                                                             |
| over 75 years, female, cemented, head size 32 mm, M+Poly           | 1197                       | 2461                                                     | 400                                                                             |

**Supplementary Table 5:** Finish results from the MSE analysis using 10-years survival probability estimates. M = metal, C = ceramic, XLP = highly crosslinked polyethylene, Poly = conventional polyethylene. The first letter gives the femoral head material while the second gives the acetabulum bearing material.

| Patient category                                                   | Number of Finnish patients | Number of NARA patients (excluding the Finnish patients) | Number of Finnish patients when the Finnish MSE becomes lower than the NARA MSE |
|--------------------------------------------------------------------|----------------------------|----------------------------------------------------------|---------------------------------------------------------------------------------|
| 60-74 years, male, cemented, head size less than 32 mm, M+Poly     | 2175                       | 16952                                                    | 200                                                                             |
| 60-74 years, female, cemented, head size less than 32 mm, M+Poly   | 3209                       | 25374                                                    | 80                                                                              |
| over 75 years, male, cemented, head size less than 32 mm, M+Poly   | 1447                       | 12075                                                    | 220                                                                             |
| over 75 years, female, cemented, head size less than 32 mm, M+Poly | 3490                       | 23591                                                    | 240                                                                             |

**Supplementary Table 6:** Swedish results from the MSE analysis using 5-years survival probability estimates. M = metal, C = ceramic, XLP = highly crosslinked polyethylene, Poly = conventional polyethylene. The first letter gives the femoral head material while the second gives the acetabulum bearing material.

| Patient category                                                   | Number of Swedish patients | Number of NARA patients (excluding the Swedish patients) | Number of Swedish patients when the Swedish MSE becomes lower than the NARA MSE |
|--------------------------------------------------------------------|----------------------------|----------------------------------------------------------|---------------------------------------------------------------------------------|
| 20-59 years, male, cemented, head size less than 32 mm, M+Poly     | 2400                       | 646                                                      | 100                                                                             |
| 20-59 years, female, cemented, head size less than 32 mm, M+Poly   | 2672                       | 995                                                      | 1880                                                                            |
| 60-74 years, male, cemented, head size less than 32 mm, M+Poly     | 13587                      | 5540                                                     | 100                                                                             |
| 60-74 years, female, cemented, head size less than 32 mm, M+Poly   | 18393                      | 10190                                                    | 60                                                                              |
| 60-74 years, female, cemented, head size less than 32 mm, C+Poly   | 3110                       | 364                                                      | 40                                                                              |
| 60-74 years, female, cemented, head size 32 mm, M+Poly             | 2342                       | 741                                                      | 100                                                                             |
| over 75 years, male, cemented, head size less than 32 mm, M+Poly   | 9209                       | 4313                                                     | 40                                                                              |
| over 75 years, female, cemented, head size less than 32 mm, M+Poly | 16391                      | 10690                                                    | 140                                                                             |

**Supplementary Table 7:** Swedish results from the MSE analysis using 10-years survival probability estimates. M = metal, C = ceramic, XLP = highly crosslinked polyethylene, Poly = conventional polyethylene. The first letter gives the femoral head material while the second gives the acetabulum bearing material.

| Patient category                                                   | Number of Swedish patients | Number of NARA patients (excluding the Swedish patients) | Number of Swedish patients when the Swedish MSE becomes lower than the NARA MSE |
|--------------------------------------------------------------------|----------------------------|----------------------------------------------------------|---------------------------------------------------------------------------------|
| 20-59 years, female, cemented, head size less than 32 mm, M+Poly   | 2672                       | 995                                                      | 1100                                                                            |
| 60-74 years, male, cemented, head size less than 32 mm, M+Poly     | 13587                      | 5540                                                     | 440                                                                             |
| 60-74 years, female, cemented, head size less than 32 mm, M+Poly   | 18393                      | 10190                                                    | 80                                                                              |
| over 75 years, male, cemented, head size less than 32 mm, M+Poly   | 9209                       | 4313                                                     | 100                                                                             |
| over 75 years, female, cemented, head size less than 32 mm, M+Poly | 16391                      | 10690                                                    | 220                                                                             |
